# Supplementary material
Source: PubMed Central journal article supplement (PMC6912598)
Supplement: NIHMS1027057-supplement-Supplemental_Material.pdf [file NIHMS1027057-supplement-Supplemental_Material.pdf]

**Diagnosis Models 1-7.** To verify that the factor analysis conducted reveals meaningful combinations of disorders, we instead conducted multiple regressions using each clinical disorder as predictors in the first 7 models (see Supplementary Table 1). Only two models were significant (Model 2, StDev RT and Model 3, PES). In Model 3, Anxiety disorder diagnosis was significantly associated with more post-error slowing, consistent with the anxiety factor model ( $\beta = 0.212, p = 0.021$ ). Otherwise, only mean RT was a significant predictor in both Models 2 and 3. Although the full Model 4 (CEs) was not significant, and thus individual predictors should generally not be interpreted, substance use disorder diagnosis was a significant predictor of commission errors ( $\beta = 0.198, p = 0.037$ ), demonstrating consistency with the substance factor model. No other clinical diagnoses were uniquely found to have a significant association with any of the gradCPT measures. These results indicate that the clinical phenotypes, particularly PTSD/mood and Somatic/TBI, are associated with attentional deficits that are not captured with any one diagnosis.

Supplementary Table 1. Summary of Multiple Regression Models using Unitary Disorders

|         | PTSD  |      |         | Depression |      |         | Anxiety |      |         | Substance |      |         |
|---------|-------|------|---------|------------|------|---------|---------|------|---------|-----------|------|---------|
|         | B     | SE B | $\beta$ | B          | SE B | $\beta$ | B       | SE B | $\beta$ | B         | SE B | $\beta$ |
| Model 1 | .003  | .016 | .019    | -.010      | .019 | -.052   | -.008   | .018 | -.045   | -.009     | .019 | -.070   |
| Model 2 | .002  | .006 | .027    | .005       | .008 | .045    | .010    | .007 | .105    | .004      | .008 | .041    |
| Model 3 | .009  | .025 | .034    | -.013      | .030 | -.041   | .066    | .028 | .212*   | -.007     | .030 | -.022   |
| Model 4 | .011  | .031 | .037    | .044       | .037 | .115    | -.002   | .035 | -.007   | .078      | .037 | .198    |
| Model 5 | -.014 | .016 | -.093   | -.010      | .019 | -.052   | -.005   | .018 | -.027   | -.006     | .019 | -.032   |
| Model 6 | -.312 | 6.63 | -.005   | -8.48      | 7.91 | -.107   | -1.54   | 7.37 | -.202   | -1.64     | 7.83 | -.020   |
| Model 7 | -.149 | .123 | -.130   | .121       | .148 | .082    | -.041   | .138 | -.029   | -.054     | .146 | -.035   |

Note. \* =  $p < 0.05$ , \*\*  $p \leq 0.01$ . Models 1-7 represents mean RT, StDev RT, PES, CE, OE, # OE lapses, & Ave OE duration.

Table continued.

|         | Pain  |      |         | Sleep |      |         | RT Total                  |      |         | Total Model    |       |          |
|---------|-------|------|---------|-------|------|---------|---------------------------|------|---------|----------------|-------|----------|
|         | B     | SE B | $\beta$ | B     | SE B | $\beta$ | B                         | SE B | $\beta$ | R <sup>2</sup> | F     | <i>p</i> |
| Model 1 | .007  | .015 | .023    | -.019 | .017 | -.107   |                           |      |         | .020           | .394  | .882     |
| Model 2 | -.004 | .006 | -.046   | .008  | .007 | .085    | .336                      | .038 | .670**  | .450           | 13.43 | .000**   |
| Model 3 | -.026 | .025 | -.093   | -.015 | .028 | -.051   | .628                      | .150 | .361**  | .176           | 3.44  | .002**   |
| Model 4 | -.006 | .030 | -.018   | .022  | .034 | .062    |                           |      |         | .073           | 1.52  | .178     |
| Model 5 | .020  | .016 | .126    | .015  | .018 | .084    | <u>OE Duration/Number</u> |      |         | .032           | .634  | .703     |
| Model 6 | 10.65 | 6.43 | .158    | 2.23  | 7.25 | .030    | 8.26                      | 4.93 | .161    | .056           | .976  | .452     |
| Model 7 | -.140 | .121 | -.111   | .123  | .135 | .090    | .003                      | .002 | .161    | .055           | .958  | .465     |

Note. \* =  $p < 0.05$ , \*\*  $p \leq 0.01$ . Models 1-7 represents mean RT, StDev RT, PES, CE, OE, # OE lapses, & Ave OE duration.
